# Supplementary material
Source: PubMed Central journal article supplement (PMC4996371)
Supplement: NIHMS808293-supplement-1.pdf [file NIHMS808293-supplement-1.pdf]

SUP FIG 1

A

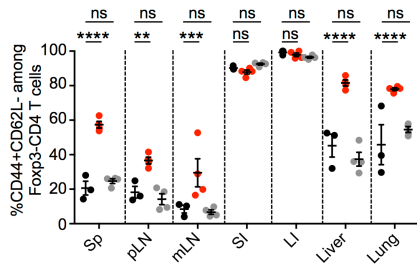

B

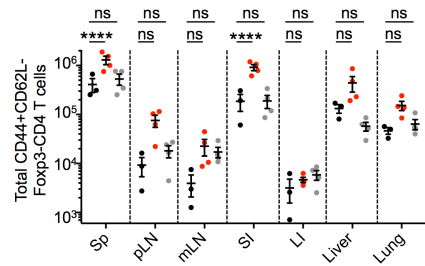

C

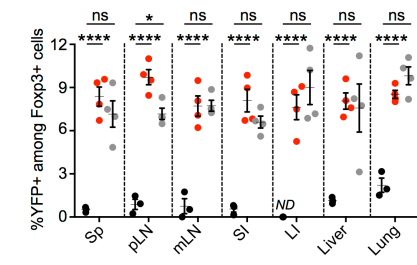

D

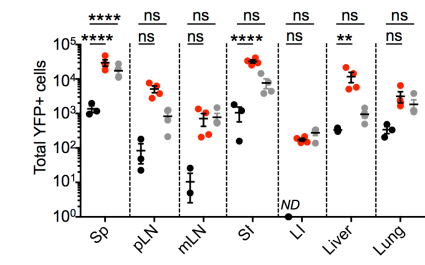

(10%) Foxp3<sup>GFP-CreERT2</sup>R26Y (90%) Foxp3<sup>GFP-DTR</sup> mixed BMC

E

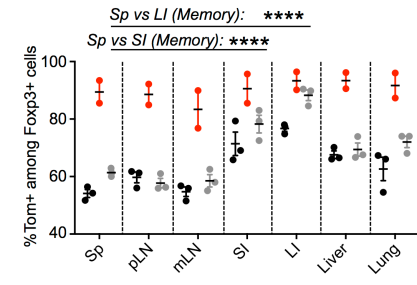

F

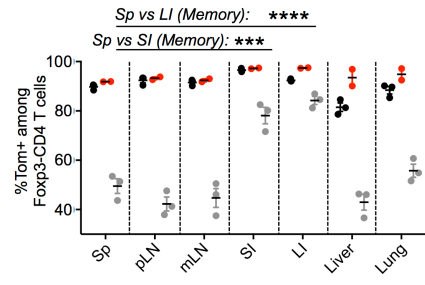

Foxp3<sup>GFP-DTR</sup>CD4<sup>CreERT2</sup>R26Tomato

G

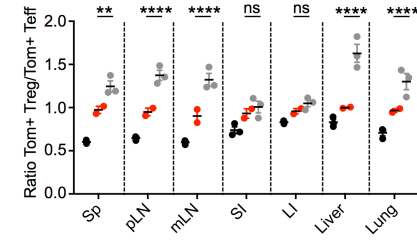

● Day 0  
● Day 11  
● Day 60
