# Supplementary material
Source: PubMed Central journal article supplement (PMC4996371)

SUP FIG 2

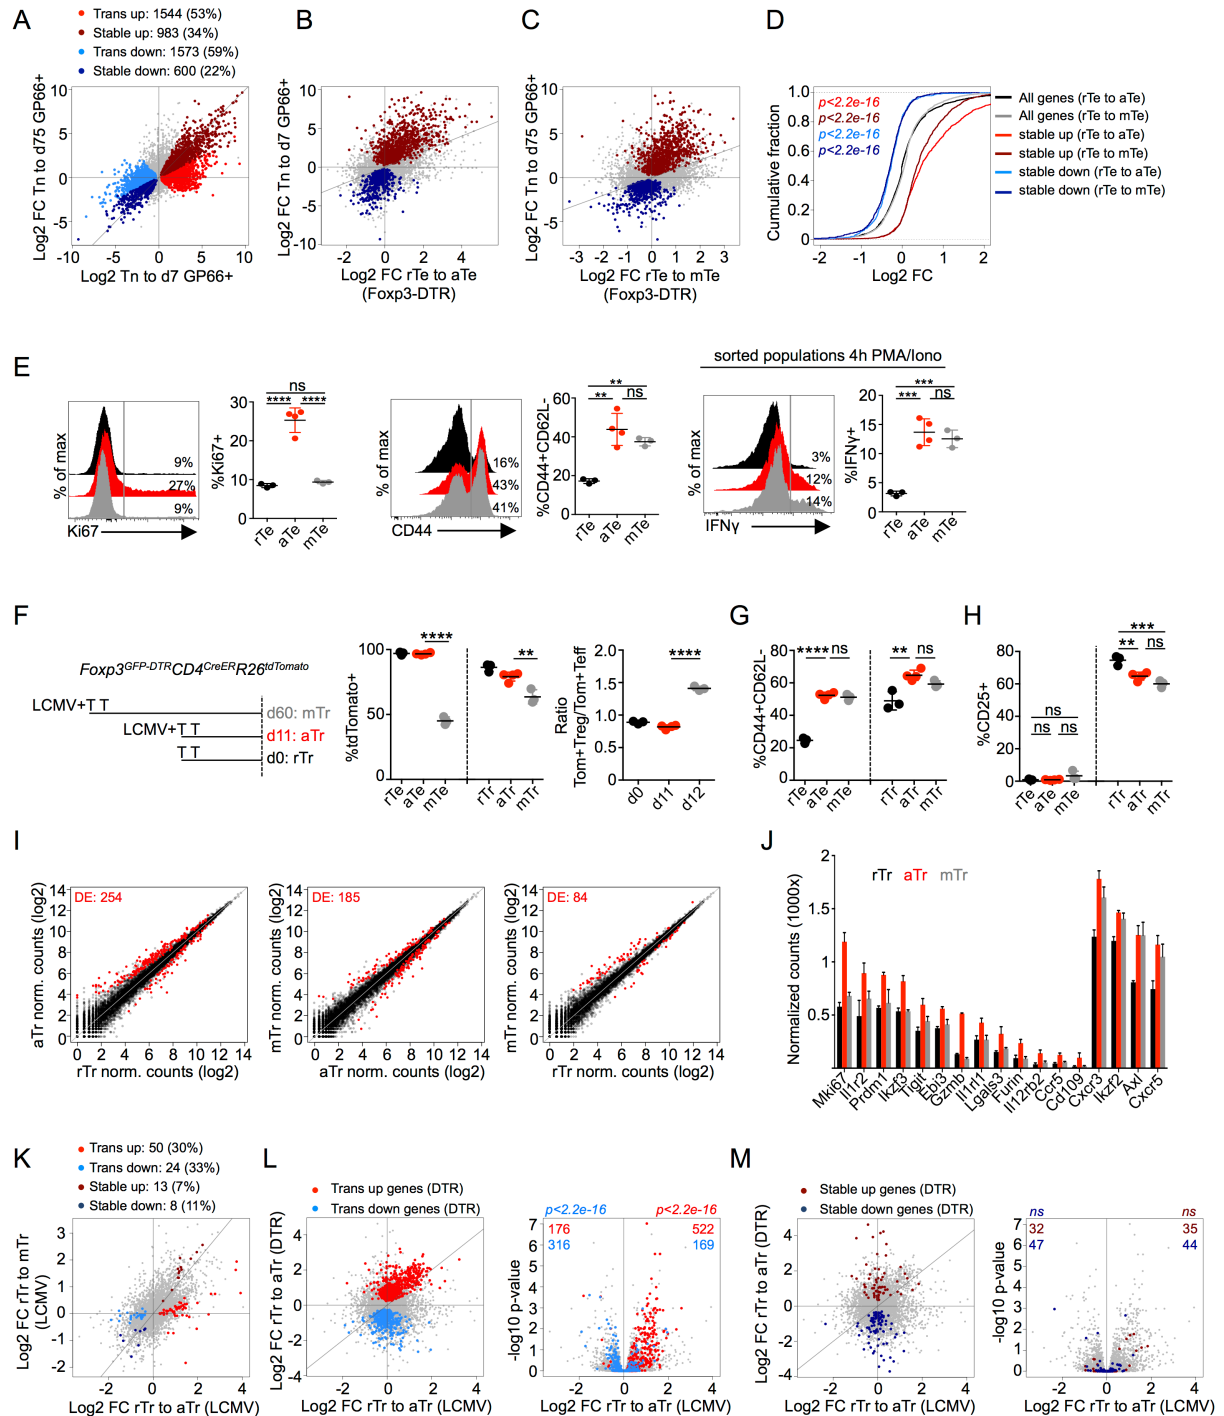

Supplement: NIHMS808293-supplement-2.pdf [file NIHMS808293-supplement-2.pdf]

SUP FIG 3

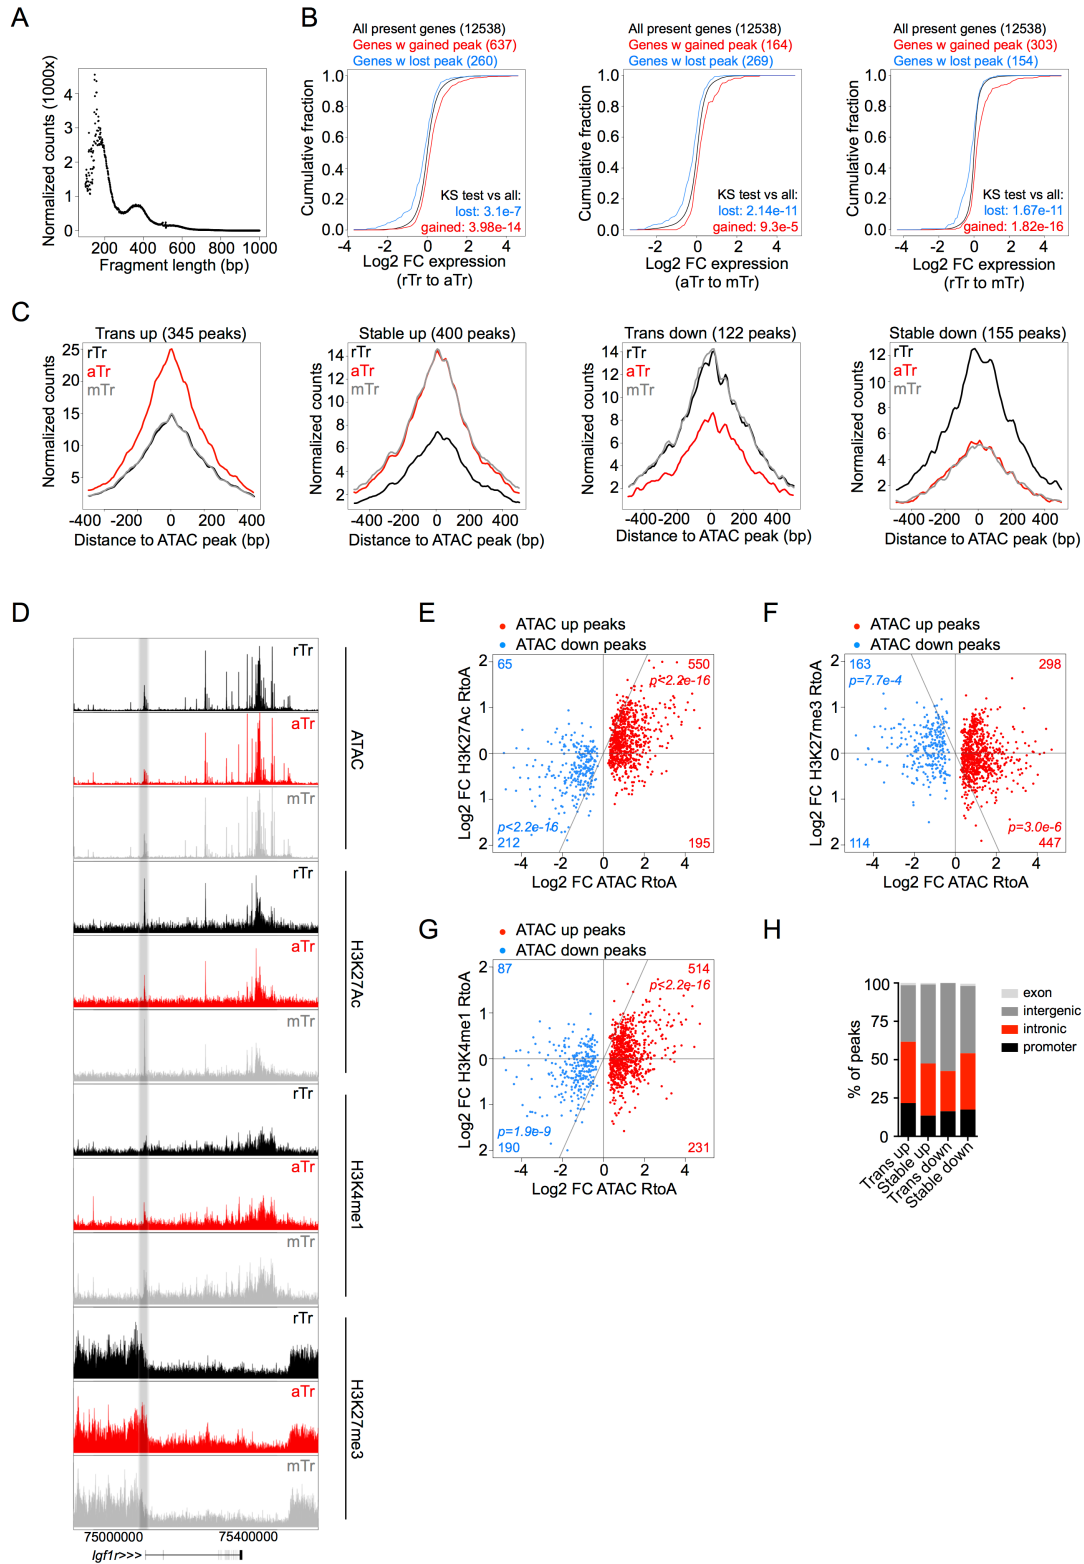

Supplement: NIHMS808293-supplement-3.pdf [file NIHMS808293-supplement-3.pdf]

SUP FIG 4

A

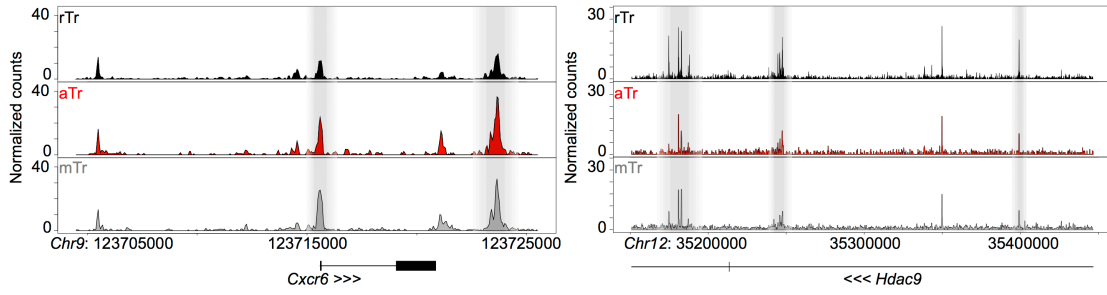

B

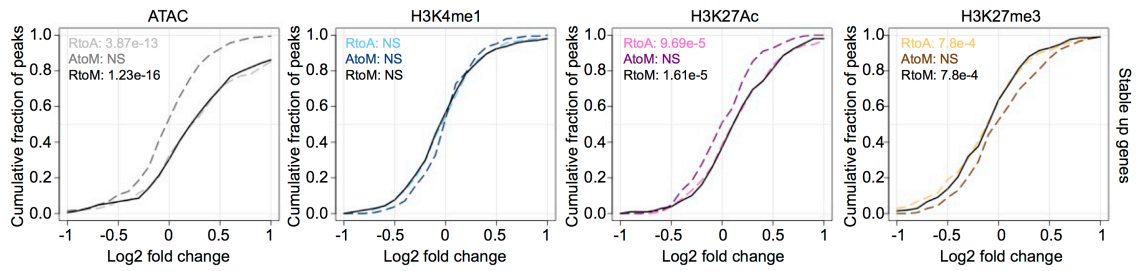

C

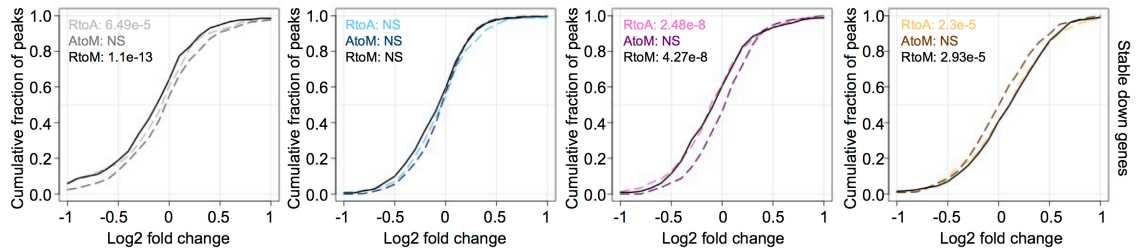

Supplement: NIHMS808293-supplement-4.pdf [file NIHMS808293-supplement-4.pdf]

# SUP FIG 5

A

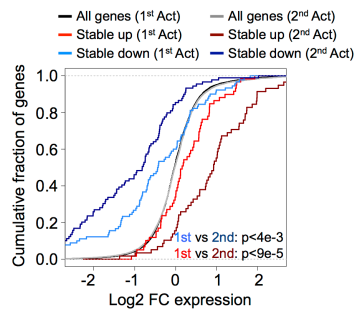

B

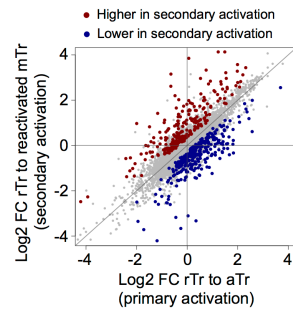

C

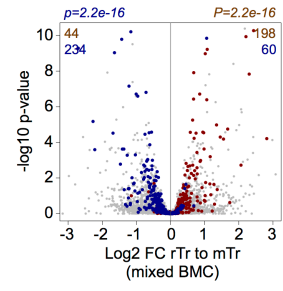

Supplement: NIHMS808293-supplement-5.pdf [file NIHMS808293-supplement-5.pdf]

SUP FIG 6

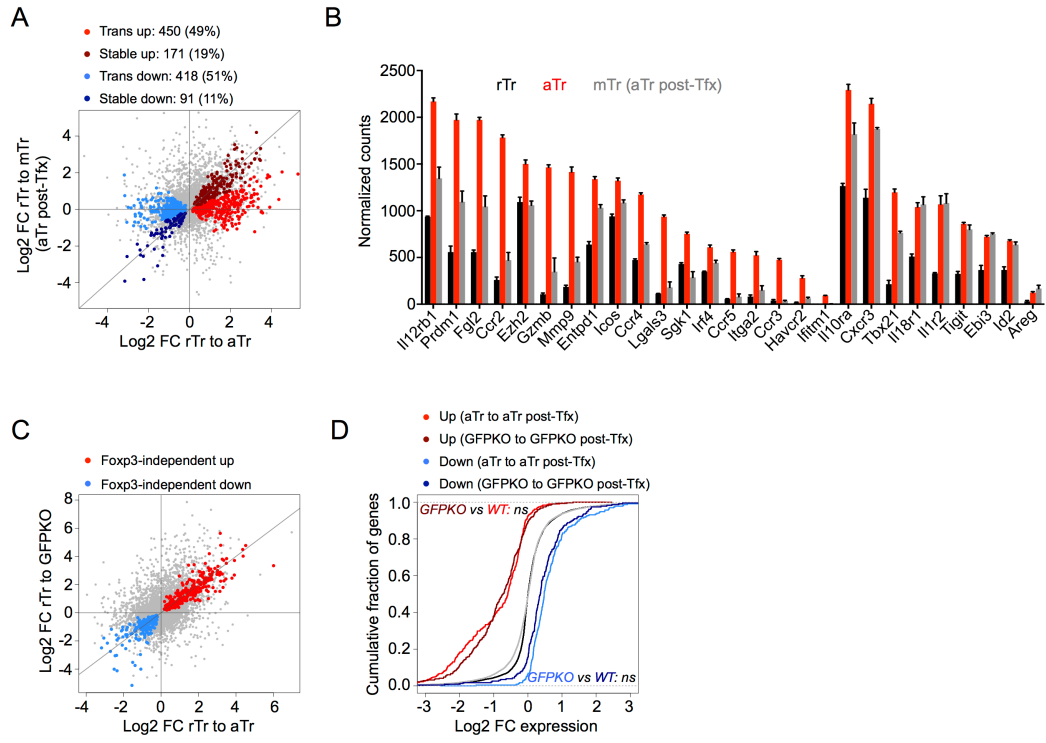

Supplement: NIHMS808293-supplement-6.pdf [file NIHMS808293-supplement-6.pdf]
